# Supplementary material
Source: PubMed Central journal article supplement (PMC4254125)
Supplement: hesr0049-1787-sd2.pdf [file hesr0049-1787-sd2.pdf]

Appendix 1: Length of Continuous Enrollment among Patients who Link to Monthly Medicaid Enrollment Files

| Number of Months Before Diagnosis | Percentage of Medicaid Patients Enrolled <sup>#</sup> |
|-----------------------------------|-------------------------------------------------------|
| 0                                 | 87.5%                                                 |
| 1                                 | 61.0%                                                 |
| 2                                 | 52.8%                                                 |
| 3                                 | 48.6%                                                 |
| 4                                 | 46.2%                                                 |
| 5                                 | 45.1%                                                 |
| 6                                 | 44.6%                                                 |
| 7                                 | 43.9%                                                 |
| 8                                 | 43.6%                                                 |
| 9                                 | 43.2%                                                 |
| 10                                | 42.6%                                                 |
| 11                                | 42.2%                                                 |
| 12                                | 41.6%                                                 |

<sup>#</sup>Percentage of total population linking to Medicaid enrollment files. The percentage does not add to 100% at month 0 as portion of the sample (12.5%) linked to enrollment files only after their diagnosis.

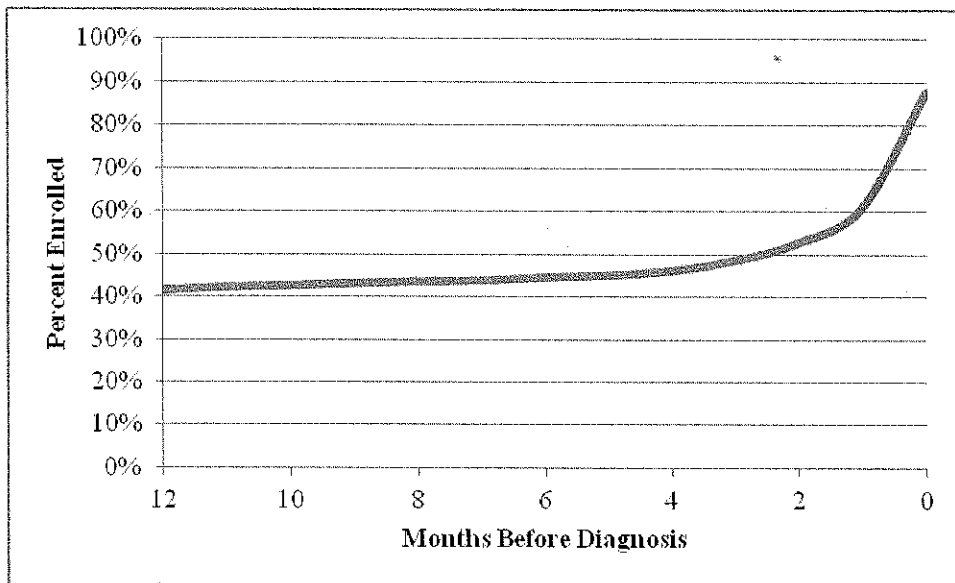

Appendix 2: Listing and Description of Medi-Cal Aid Codes for Restricted Eligibility

| Code | Description                                                                  | Code | Description                                                                                     |
|------|------------------------------------------------------------------------------|------|-------------------------------------------------------------------------------------------------|
| 0L   | Breast and Cervical Cancer Treatment Program (BCCTP) Transitional coverage . | 7C   | 100 Percent OBRA Child.                                                                         |
| 0R   | BCCTP – High Cost Other Health Coverage (OHC). State-funded.                 | 7F   | Presumptive Eligibility (PE) – Pregnancy Verification.                                          |
| 0T   | BCCTP – State-Funded.                                                        | 7G   | Presumptive Eligibility (PE) – Ambulatory Prenatal Care.                                        |
| 0U   | BCCTP – Undocumented Aliens.                                                 | 7H   | Tuberculosis (TB) Program.                                                                      |
| 0V   | Post-BCCTP.                                                                  | 7K   | Continuous Eligibility for Children (CEC).                                                      |
| 0X   | BCCTP Transitional Coverage.                                                 | 7M   | Minor Consent Program. Covers eligible minors at least 12 years of age and under the age of 21. |
| 0Y   | BCCTP Transitional Coverage.                                                 | 7N   | Minor Consent Program. Covers eligible pregnant minors under the age of 21.                     |
| 1U   | Restricted Federal Poverty Level – Aged.                                     | 7P   | Minor Consent Program. Covers eligible minors at least 12 years of age and under the age of 21. |
| 3T   | Initial Transitional Medi-Cal (TMC).                                         | 7R   | Minor Consent Program. Covers eligible minors under age 12.                                     |
| 3V   | AFDC – 1931(b) Non CalWORKS.                                                 | 7I   | Medi-Cal Dialysis Only Program/Medi-Cal Dialysis Supplement Program (DP/DSP).                   |
| 44   | 200 Percent FPL Pregnant (Income Disregard Program – Pregnant).              | 73   | Total Parenteral Nutrition (TPN).                                                               |
| 48   | 200 Percent FPL Pregnant Omnibus Budget Reconciliation Act (OBRA).           | 74   | 133 Percent Program (OBRA).                                                                     |
| 5F   | OBRA Alien – Pregnant Woman.                                                 | 76   | 60-Day Postpartum Program.                                                                      |
| 5J   | SB 87 Pending Disability Program.                                            | 77   | Organ transplants: anti-rejection medications program.                                          |
| 5R   | SB 87 Pending Disability Program.                                            | 8F   | CMSP Companion Aid Code.                                                                        |
| 5T   | Continuing TMC.                                                              | 8H   | Family PACT (FPACT).                                                                            |
| 5W   | Four-Month Continuing Pregnancy and Emergency Services Only.                 | 8N   | 133 Percent Excess Property Child – Emergency Services Only.                                    |
| 50   | County Medical Services Program (CMSP). OBRA/Out of County Care.             | 8T   | 100 Percent Excess Property Child – Pregnancy and Emergency Services Only.                      |
| 53   | Medically Indigent – Long Term Care (LTC) services.                          | 80   | Qualified Medicare Beneficiary (QMB).                                                           |
| 55   | OBRA Not PRUCOL – Long Term Care (LTC) services.                             | 84   | MI – Adult.                                                                                     |
| 58   | OBRA Aliens.                                                                 | 85   | MI – Adult.                                                                                     |
| 6U   | Restricted Federal Poverty Level – Disabled.                                 | 88   | MI – Adult – Disability Pending.                                                                |
| 69   | 200 Percent Infant OBRA.                                                     | 89   | MI – Adult – Disability Pending SOC.                                                            |



|                                             |                     |                    |                    |                    |                    |                    |                     |                     |                     |
|---------------------------------------------|---------------------|--------------------|--------------------|--------------------|--------------------|--------------------|---------------------|---------------------|---------------------|
| Private                                     | -0.944<br>(14.53)** | -0.687<br>(9.03)** | -0.683<br>(8.83)** | -1.017<br>(6.19)** | -1.097<br>(6.18)** | -1.015<br>(5.56)** | -0.665<br>(15.32)** | -0.613<br>(12.20)** | -0.555<br>(10.91)** |
| Medicare                                    | -0.017              | -0.054             | -0.028             | -0.378             | -0.392             | -0.485             | -0.331              | -0.357              | -0.353              |
|                                             | -0.21               | -0.55              | -0.27              | -1.77              | -1.71              | (2.07)*            | (6.01)**            | (5.61)**            | (5.50)**            |
| Discontinuous Medicaid                      | 0.241               | 0.016              | -0.052             | -0.177             | -0.293             | -0.372             | 0.193               | 0.031               | 0.007               |
|                                             | (3.22)**            | -0.18              | -0.58              | -0.92              | -1.42              | -1.76              | (3.68)**            | -0.53               | -0.12               |
| Uninsured                                   | -0.155              | -0.204             | -0.251             | -0.503             | -0.668             | -0.761             | -0.248              | -0.353              | -0.4                |
|                                             | (2.10)*             | (2.34)*            | (2.84)**           | (2.61)**           | (3.22)**           | (3.59)**           | (4.79)**            | (5.93)**            | (6.69)**            |
| Distance to high volume hospital<br>(miles) | -0.001              | 0.002              | 0.002              | 0                  | 0.001              | 0.002              | 0                   | 0.001               | 0                   |
|                                             | -0.79               | -1.21              | -1.68              | -0.09              | -0.5               | -0.61              | -0.33               | -0.7                | -0.44               |
| % Below 200% of FPL                         | 0.004               | 0.004              | 0.003              | 0.007              | 0.007              | 0.007              | 0.002               | 0.003               | 0.003               |
|                                             | (2.01)*             | -1.51              | -1.17              | -1.53              | -1.4               | -1.38              | -1.75               | -1.83               | -1.6                |
| % without a high school diploma             | 0.009               | 0.008              | 0.009              | 0.004              | 0.001              | -0.001             | 0.012               | 0.011               | 0.009               |
|                                             | (2.68)**            | (2.02)*            | (2.20)*            | -0.57              | -0.07              | -0.13              | (5.17)**            | (4.32)**            | (3.49)**            |
| % reporting poor English proficiency        | -0.015              | -0.012             | -0.013             | -0.008             | -0.005             | -0.004             | -0.011              | -0.013              | -0.011              |
|                                             | (3.81)**            | (2.65)**           | (2.79)**           | -0.9               | -0.51              | -0.43              | (4.31)**            | (4.32)**            | (3.53)**            |

Summary stage

Localized

ref

ref

ref

ref

ref

ref

|                            |           |           |           |           |           |           |
|----------------------------|-----------|-----------|-----------|-----------|-----------|-----------|
| Regional, direct extension | 0.615     | 0.76      | 0.627     | 0.659     | 0.747     | 0.617     |
|                            | (6.73)**  | (8.24)**  | (3.71)**  | (3.74)**  | (10.22)** | (7.99)**  |
| Regional, lymph nodes      | 0.224     | 0.393     | 0.371     | 0.367     | 0.886     | 0.489     |
|                            | (2.13)*   | (3.72)**  | (2.00)*   | -1.9      | (13.22)** | (6.89)**  |
| Regional, both             | 0.871     | 1.034     | 0.701     | 0.889     | 1.263     | 0.841     |
|                            | (10.64)** | (12.48)** | (4.70)**  | (5.63)**  | (19.00)** | (11.95)** |
| Remote                     | 2.98      | 2.933     | 1.942     | 1.593     | 2.676     | 1.947     |
|                            | (48.86)** | (47.78)** | (15.53)** | (12.20)** | (52.87)** | (35.04)** |
| Unknown                    | 2.15      | 1.929     | 1.29      | 0.979     | 1.92      | 1.24      |
|                            | (21.52)** | (19.15)** | (7.74)**  | (5.69)**  | (25.36)** | (15.75)** |
| Location‡                  |           |           |           |           |           |           |
| C__0                       | ref       | ref       | ref       | ref       | ref       | ref       |
| C__1                       | -0.632    | -0.867    | 0.452     | 0.624     | -0.402    | -0.274    |
|                            | (4.80)**  | (6.52)**  | -1.18     | -1.64     | (7.76)**  | (5.33)**  |
| C__2                       | 0.063     | 0.05      | 0.615     | 0.888     | -0.459    | -0.317    |
|                            | -0.81     | -0.63     | -1.23     | -1.75     | (5.85)**  | (3.99)**  |
| C__3                       | 0.09      | 0.09      | 0.503     | 0.56      | -0.436    | -0.266    |
|                            | -0.8      | -0.79     | -1.46     | -1.65     | (7.78)**  | (4.75)**  |
| C__4                       | -0.024    | -0.021    | 0.567     | 0.784     |           |           |

|                                   |           |           |          |           |           |           |
|-----------------------------------|-----------|-----------|----------|-----------|-----------|-----------|
| C__5                              | -0.25     | -0.21     | -1.9     | (2.67)**  | -0.132    | 0.106     |
|                                   | -0.219    | -0.198    | 0.196    | 0.51      | -1.18     | -0.91     |
|                                   | -1.71     | -1.53     | -0.68    | -1.81     | -0.003    | 0.052     |
| C__6                              | -0.325    | -0.361    |          |           | -0.05     | -0.92     |
|                                   | (3.07)**  | (3.37)**  |          |           | 0.634     | 0.634     |
|                                   | -0.475    | -0.586    |          |           | -1.38     | -1.94     |
| C__7                              | (7.17)**  | (8.70)**  |          |           | 0.761     | 1.044     |
|                                   | 0.129     | 0.056     | 0.453    | (2.38)*   | (3.30)**  | (3.30)**  |
|                                   | -0.68     | -0.28     |          |           |           |           |
| C__8                              | 0.703     | 0.341     |          |           |           |           |
|                                   | (6.77)**  | (3.17)**  |          |           |           |           |
| C19.9 (Rectosigmoid junction)     | -0.37     | -0.64     |          |           |           |           |
|                                   | (4.44)**  | (7.45)**  |          |           |           |           |
| C20.9 (Rectum NOS)                | -0.333    | -0.683    |          |           |           |           |
|                                   | (5.06)**  | (9.88)**  |          |           |           |           |
| Elixhauser Comorbidity Index      | 0.289     | 0.283     | 0.173    | 0.179     | 0.216     | 0.198     |
|                                   | (21.16)** | (20.33)** | (5.83)** | (5.83)**  | (22.60)** | (20.36)** |
| Receipt of a definitive operation |           | -0.906    |          | -1.417    |           | -1.519    |
|                                   |           | (20.93)** |          | (12.46)** |           | (32.11)** |

|          |           |           |           |       |          |          |          |           |           |
|----------|-----------|-----------|-----------|-------|----------|----------|----------|-----------|-----------|
| Constant | -2.289    | -4.166    | -3.43     | 0.177 | -1.802   | -1.588   | -0.787   | -2.768    | -1.991    |
|          | (16.75)** | (23.98)** | (19.17)** | -0.49 | (3.59)** | (3.13)** | (7.41)** | (19.90)** | (13.95)** |
| N        | 36,129    | 36,129    | 36,129    | 2,924 | 2,924    | 2,924    | 33,093   | 33,093    | 33,093    |

(Con't) Appendix 2: Full Regression Results from Nested Models in All Six Cancers

|                        | Ovary     |          |          | Pancreas  |          |          | Stomach  |          |          |
|------------------------|-----------|----------|----------|-----------|----------|----------|----------|----------|----------|
|                        | (1)       | (2)      | (3)      | (1)       | (2)      | (3)      | (1)      | (2)      | (3)      |
| Age                    | 0.042     | 0.017    | 0.012    | 0.037     | 0.034    | 0.034    | 0.002    | 0.012    | 0.013    |
|                        | (12.08)** | (4.58)** | (2.94)** | (11.54)** | (9.45)** | (9.14)** | -0.71    | (3.62)** | (3.94)** |
| Female                 | -†        | -        | -        | 0.296     | 0.26     | 0.245    | 0.061    | 0.082    | 0.059    |
|                        | -         | -        | -        | (6.05)**  | (4.86)** | (4.54)** | -1.18    | -1.3     | -0.92    |
| Race                   |           |          |          |           |          |          |          |          |          |
| Non-Hispanic White     | ref       | ref      | ref      | ref       | ref      | ref      | ref      | ref      | ref      |
| Non-Hispanic Black     | 0.671     | 0.528    | 0.451    | -0.112    | -0.163   | -0.179   | -0.018   | 0.007    | -0.035   |
|                        | (5.36)**  | (3.93)** | (3.19)** | -1.26     | -1.67    | -1.82    | -0.18    | -0.05    | -0.28    |
| Hispanic               | 0.021     | 0.018    | -0.034   | -0.097    | -0.104   | -0.115   | -0.053   | -0.149   | -0.14    |
|                        | -0.24     | -0.19    | -0.34    | -1.36     | -1.32    | -1.45    | -0.78    | -1.8     | -1.67    |
| Asian/Pacific Islander | -0.025    | 0.194    | 0.193    | -0.039    | -0.044   | -0.029   | -0.37    | -0.184   | -0.143   |
|                        | -0.23     | -1.73    | -1.66    | -0.46     | -0.47    | -0.3     | (4.98)** | (2.00)*  | -1.53    |

|       |        |        |        |         |        |        |        |        |        |
|-------|--------|--------|--------|---------|--------|--------|--------|--------|--------|
| Other | -0.523 | -0.466 | -0.499 | -0.566  | -0.489 | -0.532 | -0.457 | -0.322 | -0.344 |
|       | -1.09  | -0.9   | -0.93  | (2.19)* | -1.69  | -1.83  | -1.49  | -0.87  | -0.93  |

Insurance

|                        |          |          |         |          |          |          |          |         |        |
|------------------------|----------|----------|---------|----------|----------|----------|----------|---------|--------|
| Continuous Medicaid    | ref      | ref      | ref     | ref      | ref      | ref      | ref      | ref     | ref    |
| Private                | -0.864   | -0.553   | -0.299  | -0.699   | -0.678   | -0.677   | -0.333   | -0.273  | -0.225 |
|                        | (7.39)** | (4.30)** | (2.22)* | (6.36)** | (5.58)** | (5.53)** | (3.48)** | (2.39)* | -1.93  |
| Medicare               | -0.236   | -0.252   | -0.134  | -0.156   | -0.205   | -0.177   | 0.052    | 0.263   | 0.27   |
|                        | -1.4     | -1.37    | -0.7    | -1.03    | -1.24    | -1.06    | -0.37    | -1.55   | -1.58  |
| Discontinuous Medicaid | -0.038   | 0.099    | 0.026   | 0.022    | 0.004    | 0.036    | 0.357    | 0.238   | 0.184  |
|                        | -0.28    | -0.67    | -0.17   | -0.17    | -0.02    | -0.25    | (3.20)** | -1.8    | -1.37  |
| Uninsured              | -0.266   | -0.13    | -0.111  | -0.422   | -0.484   | -0.552   | -0.011   | -0.071  | -0.08  |
|                        | (1.99)*  | -0.88    | -0.72   | (3.31)** | (3.45)** | (3.90)** | -0.1     | -0.55   | -0.61  |

Distance to high volume hospital (miles)

|  |       |       |       |       |       |       |       |       |       |
|--|-------|-------|-------|-------|-------|-------|-------|-------|-------|
|  | 0.002 | 0.002 | 0.002 | 0     | 0     | 0.001 | 0     | 0.001 | 0.001 |
|  | -1.75 | -1.63 | -1.5  | -0.31 | -0.44 | -0.72 | -0.04 | -0.57 | -0.48 |

% Below 200% of FPL

|  |       |       |       |       |       |       |       |       |       |
|--|-------|-------|-------|-------|-------|-------|-------|-------|-------|
|  | 0.006 | 0.007 | 0.006 | 0.005 | 0.005 | 0.005 | 0.001 | 0.004 | 0.004 |
|  | -1.63 | -1.74 | -1.38 | -1.55 | -1.56 | -1.44 | -0.42 | -1.04 | -1.2  |

% without a high school diploma

|  |          |       |       |       |       |       |          |         |       |
|--|----------|-------|-------|-------|-------|-------|----------|---------|-------|
|  | 0.016    | 0.013 | 0.011 | 0.007 | 0.009 | 0.009 | 0.013    | 0.012   | 0.009 |
|  | (2.60)** | -1.92 | -1.6  | -1.34 | -1.6  | -1.64 | (2.89)** | (2.29)* | -1.7  |



|                                      |     | -0.023    | -0.02     | -0.017    | -0.006    | -0.009    | -0.009    | -0.016    | -0.016    | -0.014    |
|--------------------------------------|-----|-----------|-----------|-----------|-----------|-----------|-----------|-----------|-----------|-----------|
| % reporting poor English proficiency |     | (3.08)**  | (2.57)*   | (2.09)*   | -1.07     | -1.49     | -1.41     | (3.18)**  | (2.65)**  | (2.21)*   |
| Summary stage                        |     |           |           |           |           |           |           |           |           |           |
| Localized                            | ref | ref       | ref       | ref       | ref       | ref       | ref       | ref       | ref       | ref       |
| Regional, direct extension           |     | 0.779     | 0.755     | 0.82      | 0.737     | 0.82      | 0.737     | 1.343     | 1.343     | 1.333     |
|                                      |     | (3.69)**  | (3.53)**  | (6.90)**  | (6.09)**  | (6.90)**  | (6.09)**  | (8.72)**  | (8.72)**  | (8.43)**  |
| Regional, lymph nodes                |     | 0.669     | 0.542     | 0.269     | 0.294     | 0.269     | 0.294     | 0.802     | 0.802     | 0.942     |
|                                      |     | -1.22     | -0.98     | -1.56     | -1.68     | -1.56     | -1.68     | (5.81)**  | (5.81)**  | (6.67)**  |
| Regional, both                       |     | 1.023     | 1.113     | 0.557     | 0.571     | 0.557     | 0.571     | 1.363     | 1.363     | 1.565     |
|                                      |     | (2.74)**  | (2.97)**  | (4.59)**  | (4.63)**  | (4.59)**  | (4.63)**  | (11.22)** | (11.22)** | (12.49)** |
| Remote                               |     | 2.291     | 1.981     | 2.205     | 1.976     | 2.205     | 1.976     | 3.16      | 3.16      | 2.88      |
|                                      |     | (12.90)** | (10.96)** | (20.48)** | (17.82)** | (20.48)** | (17.82)** | (29.58)** | (29.58)** | (26.40)** |
| Unknown                              |     | 3.006     | 2.112     | 1.464     | 1.261     | 1.464     | 1.261     | 2.008     | 2.008     | 1.648     |
|                                      |     | (13.92)** | (9.41)**  | (9.90)**  | (8.38)**  | (9.90)**  | (8.38)**  | (14.63)** | (14.63)** | (11.76)** |
| Location‡                            |     |           |           |           |           |           |           |           |           |           |
| C__0                                 | ref | -         | -         | ref       |
| C__1                                 |     |           |           | 0.142     | -0.066    | 0.142     | -0.066    | -0.23     | -0.23     | -0.125    |
|                                      |     |           |           | -1.53     | -0.7      | -1.53     | -0.7      | -1.45     | -1.45     | -0.77     |
| C__2                                 |     |           |           | -0.105    | -0.254    | -0.105    | -0.254    | 0.167     | 0.167     | 0.244     |
